# Supplementary material for: The Vector Competence of Asian Longhorned Ticks in Langat Virus Transmission
Source: MDPI journal article supplement (doi:10.3390/v16020304), 2024-02-16
Supplement: s1 [file s1]

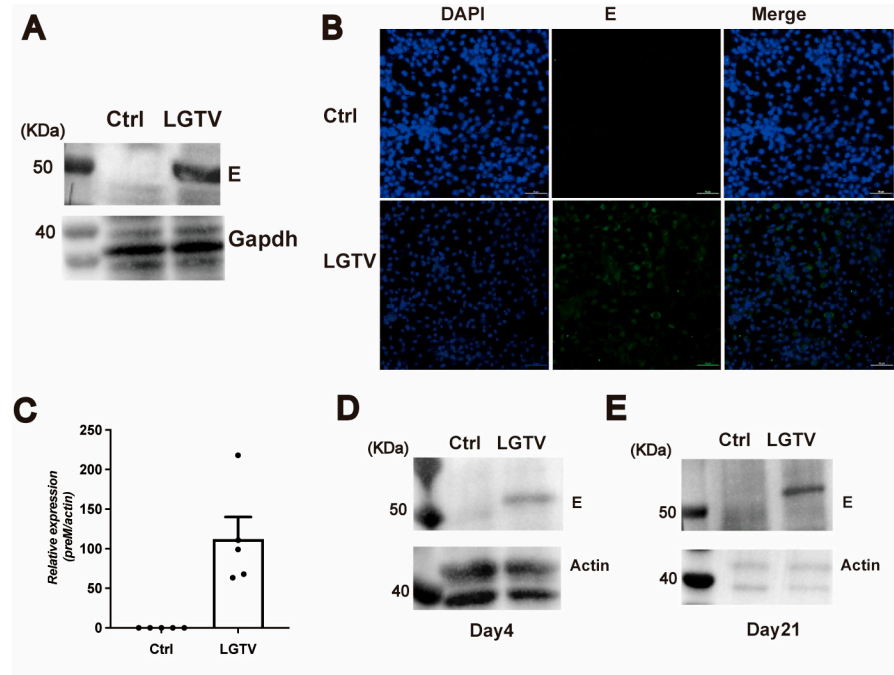

**Figure S1.** Validation of LGTV anti-EDIII.

**(A) Detection of E protein in infected BHK21 cells.** Lysates of infected cells were collected and analysed by western blot.

**(B) Immunofluorescence analysis of E protein.** BHK21 cells were infected with LGTV with moi=0.1. Immunofluorescence assay was performed on BHK21 cells 24 h post infection. Rabbit polyclonal anti-LGTV-EDIII (1:300) and Alexa Fluor 546 F(ab')<sub>2</sub> fragment of goat anti-rabbit IgG (1:1000) were used.

**(C) LGTV detection in ticks by qPCR.** Nymphs were infected with 150pfu LGTV via anal pore microinjection. Quantification of preM gene expression was performed 4 dpi by qPCR using a standard curve.

**(D) and (E) LGTV detection by western blot.** The infection prevalence of LGTV in ticks was 100% based on qPCR (C). To determine the specificity of the anti-E antibody, western blot was performed on ticks at 4dpi and 21dpi. Actin was used as a internal reference.
